# Supplementary material for: The mwtab Python Library for RESTful Access and Enhanced Quality Control, Deposition, and Curation of the Metabolomics Workbench Data Repository
Source: MDPI journal article supplement (doi:10.3390/metabo11030163), 2021-03-12
Supplement: s1 [file s1]

**Supplemental Table S1.** List of analysis IDs and the format of files which could not be parsed into '~mwtab.mwtab.MWTabFile' objects.

| File Format           | Analysis ID                                                                                                                                                                                                                                                                                                                                                                                                                                                                                                                                                                                                                                                                                                                                                                                                                                                                                                                                                                                                                                                                                                                                                                                                                                                                                                                                                                                                                                      |
|-----------------------|--------------------------------------------------------------------------------------------------------------------------------------------------------------------------------------------------------------------------------------------------------------------------------------------------------------------------------------------------------------------------------------------------------------------------------------------------------------------------------------------------------------------------------------------------------------------------------------------------------------------------------------------------------------------------------------------------------------------------------------------------------------------------------------------------------------------------------------------------------------------------------------------------------------------------------------------------------------------------------------------------------------------------------------------------------------------------------------------------------------------------------------------------------------------------------------------------------------------------------------------------------------------------------------------------------------------------------------------------------------------------------------------------------------------------------------------------|
| mwTab                 | AN000132, AN000152, AN000153, AN000154, AN000261, AN000418, AN000721, AN000956, AN001296, AN001297, AN001298, AN001299, AN001982, AN001996, AN001997, AN002105, AN002106, AN002107, AN002108, AN002149, AN002150, AN002209, AN002210, AN002235, AN002236, AN002237, AN002238, AN002239, AN002242, AN002255, AN002256, AN002257, AN002258, AN002259, AN002290, AN002291, AN002292, AN002298, AN002323, AN002324, AN002325, AN002326, AN002327, AN002328, AN002329, AN002330, AN002331, AN002347, AN002348, AN002363, AN002378, AN002379, AN002385, AN002386, AN002391, AN002392, AN002396, AN002397, AN002418, AN002420, AN002445, AN002446, AN002447, AN002448, AN002449, AN002450, AN002451, AN002453, AN002468, and AN002469                                                                                                                                                                                                                                                                                                                                                                                                                                                                                                                                                                                                                                                                                                                   |
| JSON                  | AN000020, AN000030, AN000041, AN000046, AN000047, AN000048, AN000049, AN000050, AN000051, AN000052, AN000053, AN000054, AN000055, AN000056, AN000057, AN000058, AN000059, AN000085, AN000086, AN000087, AN000094, AN000132, AN000152, AN000153, AN000154, AN000155, AN000156, AN000163, AN000167, AN000168, AN000171, AN000172, AN000226, AN000227, AN000228, AN000229, AN000230, AN000231, AN000233, AN000234, AN000237, AN000245, AN000246, AN000258, AN000259, AN000261, AN000270, AN000271, AN000274, AN000275, AN000284, AN000285, AN000317, AN000318, AN000332, AN000418, AN000856, AN000857, AN000858, AN000859, AN000860, AN000861, AN000937, AN000938, AN000945, AN000956, AN001311, AN001312, AN001313, AN001471, AN001517, AN001529, AN001530, AN001538, AN001539, AN001554, AN001555, AN001556, AN001557, AN001572, AN001573, AN001574, AN001575, AN001619, AN001624, AN001625, AN001626, AN001627, AN001647, AN001648, AN001651, AN001652, AN001653, AN001654, AN001655, AN001656, AN001657, AN001658, AN001681, AN001682, AN001683, AN001706, AN001721, AN001733, AN001738, AN001752, AN001763, AN001864, AN001865, AN002109, AN002172, AN002173, AN002197, AN002209, AN002210, AN002229, AN002230, AN002242, AN002290, AN002291, AN002292, AN002320, AN002334, AN002343, AN002347, AN002348, AN002393, AN002407, AN002408, AN002409, AN002418, AN002420, AN002445, AN002446, AN002447, AN002448, AN002449, AN002450, and AN002451 |
| Both 'mwTab' and JSON | AN000132, AN000152, AN000153, AN000154, AN000261, AN000418, AN000956, AN002209, AN002210, AN002242, AN002290, AN002291, AN002292, AN002347, AN002348, AN002418, AN002420, AN002445, AN002446, AN002447, AN002448, AN002449, AN002450, and AN002451                                                                                                                                                                                                                                                                                                                                                                                                                                                                                                                                                                                                                                                                                                                                                                                                                                                                                                                                                                                                                                                                                                                                                                                               |

**Supplemental Table S2.** List of common metabolite metadata headings from 'METABOLITES' blocks of MS analyses, Regular Expressions (RegExs) used to match field names, and examples of similar/matching fields present in analysis files.

| Common Field Name | RegEx Pattern(s)                                                        | Example Matched Field Names                                                                                                                                                                                                                                                                                   |
|-------------------|-------------------------------------------------------------------------|---------------------------------------------------------------------------------------------------------------------------------------------------------------------------------------------------------------------------------------------------------------------------------------------------------------|
| hmdb_id           | r"(?i)[\s  \S]{,}(HMDB)"<br>r"(?i)(Human Metabolome D)[\S]{,}"          | HMDB ID (*representative)<br>HMDB (*Representative ID)<br>HMDB_ID<br>HMDB ID (*Representative ID)<br>Representative HMDB ID<br>HMDB ID (*representative ID)<br>HMDBID<br>HMDB ID<br>Representative HMDB<br>Human Metabolome Database<br>HMDB.ID<br>HMDB<br>HMDB ID (*representativeID)<br>Human Metabolome DB |
| inchi_key         | r"(?i)(inchi)[\S]{,}"                                                   | Inchi_Key<br>InChIKey<br>InchiKey<br>InChi key<br>InChi-Key<br>InChiKey<br>InChI Key<br>InchiKEY<br>INCHIKEY<br>InChI key                                                                                                                                                                                     |
| kegg_id           | r"(?i)(kegg)\$"<br>r"(?i)(kegg)(\s _)(i)"                               | KEGG<br>KEGG I<br>Kegg ID<br>KEGG_ID<br>KEGG id<br>KEGG ID                                                                                                                                                                                                                                                    |
| moverz            | r"(?i)(m/z)"                                                            | m/z<br>M/Z<br>m/z rounded                                                                                                                                                                                                                                                                                     |
| moverz_quant      | r"(?i)(moverz)(\s _)(quant)"<br>r"(?i)(quan)[\S]{,}(\s _)(m)[\S]{,}(z)" | Quantified m/z<br>quantitated mz<br>Moverz Quant                                                                                                                                                                                                                                                              |

|                 |                                                |                                                                                                                                                                                                                                                                                          |
|-----------------|------------------------------------------------|------------------------------------------------------------------------------------------------------------------------------------------------------------------------------------------------------------------------------------------------------------------------------------------|
|                 |                                                | quantified m/z<br>quantified mz<br>Quantited m/z<br>quant_moverz<br>Quant m/z<br>quant mz<br>quantitated m/z                                                                                                                                                                             |
| other_id        | r"(?i)(other)(\s _)(id)\$"                     | Other ID<br>Other_ID                                                                                                                                                                                                                                                                     |
| pubchem_id      | r"(?i)(pubchem)[\S]{,}"                        | PubChem CID<br>Pubchem ID<br>PubChem<br>PubChem ID<br>PUBCHEM ID<br>Pubchem_Derivative<br>PubChem id<br>Pubchem Id<br>PUBCHEM                                                                                                                                                            |
| retention_index | r"(?i)(ri)\$"<br>r"(?i)(ret)[\s \S]{,}(index)" | retention time index<br>ri<br>Retention index<br>Retention Index<br>ret index<br>ret.index<br>retention index<br>retention index (min)<br>Ret. Index                                                                                                                                     |
| retention_time  | r"(?i)(r)[\s \S]{,}(time)[\S]{,}"              | retention_times<br>retention time index<br>Retention Time<br>Retention Times<br>Retention time<br>retention time(s)<br>rtimes(mins)<br>rtimes (min)<br>retention_time(min)<br>rtimes<br>Retention times<br>row retention time<br>Retention time (min)<br>Ret.Time<br>Retention Time(min) |

|  |  |                                                                                             |
|--|--|---------------------------------------------------------------------------------------------|
|  |  | Retention Time (mins)<br>retention time<br>RTimes (min)<br>retention times<br>rtimes (mins) |
|--|--|---------------------------------------------------------------------------------------------|
